# Supplementary material for: Effect of gender, muscle type and skinfold thickness on myometric parameters in young people
Source: PeerJ. 2021 Nov 10;9:e12367. doi: 10.7717/peerj.12367 (PMC8590390; doi:10.7717/peerj.12367)
Supplement: Supplemental Information 1 — Myometric data and skinfold values measured over the biceps brachii (BB), rectur femoris (FR) and tibialis anterior (TA) muscles of the subjects. [file peerj-09-12367-s001.xls]

## Sheet: raw data
ID	side	BMI	sex	gender	BB_skinfold	BBF	BBD	BBS	BBC	BBR	RF_skinfold	RFF	RFD	RFS	RFC	RFR	TA_skinfold	TAF	TAD	lTAC	lTAR	TAS
0 8 K	right	19.4357	women	1	4.4	14.1	1.08	233	1.18	20.4	18.2889	14.2	0.98	228	1.26	21.2	12.4	16.9	0.92	1.05	16.9	342
0 9 K	right	18.6998	women	1	3.4	15.9	1.03	249	1.01	17.4	14.2	14.4	1.07	257	1.06	18.3	7	20.5	0.68	0.82	13.3	402
1 4 K	right	21.7751	women	1	5.4	14.3	0.93	231	1.27	22.2	24	14	1.41	262	1.28	21.2	12	19.7	0.8	0.85	13.6	377
1 5 K	right	20.7803	women	1	7.2	14.5	0.9	231	1.12	19.4	18.2889	13.1	1.01	221	1.1	18.6	12.2	19.1	0.74	0.9	14.3	402
1 6 K	right	23.3876	women	1	10	13.8	1.18	232	1.29	21.9	24	12.4	1.2	212	1.38	22.9	14	17.2	0.96	1.03	16.5	326
1 7 K	right	20.2297	women	1	6.4	13.4	0.94	210	1.15	20.2	16	13.3	1.22	246	1.31	21.9	10.8	18.3	0.87	1.12	18.1	334
1 8 K	right	19.6441	women	1	5.4	14.1	1.02	212	1.26	22.7	16.8	14.1	1.72	251	1.36	22.3	12	17.2	0.78	1.03	17.4	313
1 9 K	right	20.8611	women	1	7.2	14.4	1.12	240	1.17	19.6	22	13	0.98	228	1.42	23.3	13	19.6	0.87	0.81	12.6	417
2 2 K	right	19.6035	women	1	7	13.8	1.2	219	1.21	21.2	18.2889	13.6	0.87	249	1.16	20.8	14	16.6	0.99	1.04	16.7	325
2 3 K	right	23.9188	women	1	6.4	13.8	1.21	225	1.23	22.5	18.2889	14.4	1.24	254	1.24	21.1	11.9538	20.2	0.81	0.97	15.4	396
2 4 K	right	18.132	women	1	7.2	14.6	1.13	244	1.2	20.6	21	13.4	1.01	235	1.36	23.2	13.2	20.3	0.78	0.81	12.8	412
2 8 K	right	23.2835	women	1	8.6	14.6	1.2	248	1.24	21.5	18.2889	13.8	1.28	257	1.41	23.2	11.9538	20.8	0.98	0.9	14.4	414
2 9 K	right	22.2373	women	1	7.4	13.9	1.27	231	1.27	21.7	18.2889	13	1.27	227	1.37	22.4	14	19.8	0.89	0.9	14.3	380
3 0 K	right	19.7266	women	1	5	15	0.86	239	1.19	21.2	11.2	14.5	0.93	259	1.36	22.9	11.4	18.8	0.79	1	16	350
3 1 K	right	19.2164	women	1	8	12.3	0.95	186	1.29	23.4	15.4	13.2	0.8	216	1.31	23.1	9.4	18.7	0.8	0.89	14.5	391
3 2 K	right	18.7601	women	1	6.4	14.8	1.1	252	1.18	20.2	18.2889	15.4	1.17	293	1.18	19.1	11.9538	19.3	0.84	0.88	13.9	404
0 8 K	left	19.4357	women	1	4.4	14.3	1.16	233	1.24	21.2	19.1375	13.5	1.01	249	1.18	20.5	13	16	0.82	1	16.1	320
0 9 K	left	18.6998	women	1	4.2	16.3	0.99	268	1.05	18	12	15.7	0.98	255	1.24	20.7	7.4	20.7	0.61	0.86	13.8	407
1 4 K	left	21.7751	women	1	6	13.6	1.09	214	1.26	21.7	19.1375	13.9	1.1	266	1.35	22.2	12.2	19.8	0.73	0.88	14.2	386
1 5 K	left	20.7803	women	1	7	14.8	0.88	238	1.15	19.9	17.4	14.4	0.88	265	1.3	22.4	13.4	17.1	0.85	0.84	13.4	367
1 6 K	left	23.3876	women	1	11.4	12.9	1.32	229	1.22	20.9	19.1375	13.3	1.32	236	1.42	24.4	17	17.2	0.97	1.07	17	346
1 7 K	left	20.2297	women	1	6.6	14.5	1.01	221	1.22	21.6	18	13.9	0.99	247	1.39	22.8	12	17.1	0.85	1.07	17.1	302
1 8 K	left	19.6441	women	1	6.2	13.5	1.06	195	1.23	21.8	20	14	1.5	250	1.33	22	11.2	15.5	0.77	1.02	16.5	286
1 9 K	left	20.8611	women	1	8	15	1.08	250	1.24	21	28	13.3	1.28	242	1.36	23.1	13	19.5	0.96	0.8	12.7	431
2 2 K	left	19.6035	women	1	6.8	13.3	1.16	219	1.19	21	19.1375	13.1	0.79	219	1.23	20.9	13	17.1	0.96	1.05	17	324
2 3 K	left	23.9188	women	1	6.2	12.9	0.9	187	1.12	19.9	19.1375	14.1	1.15	250	1.24	20.7	12	18.1	0.8	0.88	14.1	356
2 4 K	left	18.132	women	1	6.6	14.4	1.15	235	1.17	20	27.3	12.8	1.12	231	1.28	22	12.1714	20.8	0.83	0.85	13.5	434
2 8 K	left	23.2835	women	1	9.6	13.9	1.08	225	1.15	19.7	19.1375	13.1	1.22	249	1.39	22.8	14	18.6	0.93	0.87	13.7	369
2 9 K	left	22.2373	women	1	8.6	13.6	1.26	225	1.28	21.8	19.1375	13.7	1.35	254	1.43	24.1	12.5	20	0.84	0.9	14.3	389
3 0 K	left	19.7266	women	1	7	14.2	0.97	216	1.13	19.8	14.4	13	1.07	229	1.19	19.8	11.5	18.6	0.84	0.99	15.9	354
3 1 K	left	19.2164	women	1	6	12.7	1.16	189	1.34	24.3	16	12.8	0.95	206	1.27	22.3	8.2	17.3	0.78	0.86	13.8	355
3 2 K	left	18.7601	women	1	7.2	13.9	1.07	233	1.15	19.5	19.1375	15.2	1.18	299	1.21	19.6	12.0591	18.8	0.82	0.87	13.9	393
0 1 M	right	22.1385	men	2	2.4	13.4	1	199	1.29	23.6	7	13	1.35	230	1.38	22.8	4.4	19.4	0.76	0.91	14.8	388
0 2 M	right	24.4661	men	2	3.8	14.3	1.28	232	1.17	20.3	7.7	14.5	1.53	294	1.23	20	6	20.6	0.94	0.91	14.5	399
0 3 M	right	24.3363	men	2	3.4	14	0.99	213	1.15	20.7	14	15.4	1.33	280	1.26	20.8	7	21.9	0.76	0.81	12.8	445
0 4 M	right	20.2812	men	2	4.2	14.2	1.02	217	1.13	19.6	8.2	15.8	1.67	313	1.23	20	6	23.5	0.77	0.71	11	502
0 5 M	right	23.4805	men	2	5	13.3	0.99	187	1.21	21.8	12.4	14.1	1.56	272	1.35	21.8	6	20	0.74	0.98	15.6	380
0 6 M	right	22.16	men	2	3.2	14.1	1.19	230	1.19	20.4	14	15.4	1.46	274	1.3	21.8	5.2	20.4	0.67	1.27	20.8	399
0 7 M	right	21.5529	men	2	3.2	13.9	1.32	238	1.22	21.4	9.4	14.8	1.38	268	1.31	21.7	5.4	19.2	0.72	0.88	14.3	331
1 0 M	right	22.4966	men	2	3.42857	14.3	1.28	242	1.13	18.7	10.1615	15.3	1.39	310	1.16	18.6	6	22.1	0.64	0.69	10.8	474
1 1 M	right	21.8283	men	2	3	14.2	1.06	226	1.24	22	6	14.3	1.91	296	1.26	20.2	5.4	20.2	0.87	0.83	13	389
1 2 M	right	22.2222	men	2	3.4	13.8	1.11	229	1.19	20.2	13	17	1.27	346	1.02	16.2	6	20.5	0.75	0.841481	14.2667	394
1 3 M	right	21.5052	men	2	3.8	15	0.98	244	1.09	19.4	10.4	15.3	1.53	290	1.24	20.4	6	22.9	0.72	0.7	11.1	527
2 0 M	right	25.9117	men	2	2.4	13.3	0.92	194	1.24	23.2	13	14.1	1.19	258	1.21	20.4	7.6	18.9	0.77	0.68	10.8	360
2 1 M	right	25.2801	men	2	4	14.2	1.13	236	1.22	21.5	9	15.2	1.08	260	1.22	19.7	6	18	0.750714	0.76	24.9	337
2 5 M	right	26.5361	men	2	3.2	13.3	1.02	204	1.18	21.5	8	15.8	1.81	258	1.24	20.8	6	21.3	0.72	0.841481	14.2667	414
2 6 M	right	26.5957	men	2	3.42857	14.6	1.15	243	1.13	19.6	10.1615	16.1	1.37	314	1.17	19	6	23.1	0.68	0.841481	14.2667	485
2 7 M	right	26.7378	men	2	3	13.8	1	195	1.11	20.2	10.1615	15	1.28	267	1.21	19.8	6	20.8	0.750714	0.841481	14.2667	414.933
0 1 M	left	22.1385	men	2	2.4	12.4	1.23	180	1.19	21.9	6.8	13.7	1.59	249	1.4	23.8	4.4	19.2	0.7	0.89	14.4	361
0 2 M	left	24.4661	men	2	4.2	14.4	1.28	235	1.17	20.4	7.2	15	1.52	290	1.24	20.1	6	20.6	0.88	0.91	14.5	399
0 3 M	left	24.3363	men	2	4	13.5	1.14	208	1.14	20.6	15	14.6	1.41	270	1.22	20	9	21.7	0.74	0.76	21.1	427
0 4 M	left	20.2812	men	2	6	15.3	1	241	1.17	20.9	8.2	15	1.51	286	1.18	18.9	7.23636	22.9	0.86	0.69	10.8	510
0 5 M	left	23.4805	men	2	4	13.4	1.12	203	1.22	22.4	12	14.8	1.53	278	1.32	21.7	7	19.4	0.88	0.9	14.6	377
0 6 M	left	22.16	men	2	4.2	14.4	1.25	241	1.18	20.4	13.4	14.4	1.43	248	1.28	21	4.4	14.9	1.44	0.85	13.7	275
0 7 M	left	21.5529	men	2	4	13.9	1.25	220	1.21	20.9	8.6	15	1.76	255	1.26	20.8	5.4	20.1	0.68	0.99	16.2	364
1 0 M	left	22.4966	men	2	8.4	15	1.31	271	1.16	20	10.3615	15.8	1.35	309	1.2	19.3	7.23636	21.2	0.73	0.71	11.3	506
1 1 M	left	21.8283	men	2	3.2	13.4	1.03	208	1.17	20.6	6	15.3	1.66	304	1.2	19.5	6	21.6	0.85	0.89	14.2	445
1 2 M	left	22.2222	men	2	3.4	14.9	1.03	245	1.27	21.8	14	17.7	1.19	349	1.02	16.2	6.4	20.35	0.836667	0.89	14.2	422.667
1 3 M	left	21.5052	men	2	3.6	14.9	0.95	231	1.14	19.5	12	14.8	1.53	281	1.18	19.3	10	19.9	0.78	0.65	10.3	484
2 0 M	left	25.9117	men	2	2.6	13	0.84	183	1.2	22.1	15	14.2	0.87	250	1.24	20.7	11	20.9	0.77	0.94	15.1	479
2 1 M	left	25.2801	men	2	4.2	14.1	1.18	221	1.27	21.7	9	16.2	1.51	294	1.18	19.8	10	21.8	0.73	0.97	15.8	445
2 5 M	left	26.5361	men	2	3.2	13.6	1.02	197	1.22	21.9	7.5	14.7	1.08	251	1.36	22.2	7.23636	20.35	0.836667	0.83	13.3	422.667
2 6 M	left	26.5957	men	2	7.6	14.6	1.07	240	1.17	20.1	10.3615	15.5	1.32	305	1.14	18.4	7.23636	20.35	0.836667	0.72	11.3	422.667
2 7 M	left	26.7378	men	2	4.33333	14.6	1	209	1.12	20.9	10.3615	15.2	1.16	280	1.26	20.7	7.23636	20.35	0.836667	0.841481	14.2667	422.667

## Sheet: descriptive legend
LEGEND
BMI - body mass index
gender: 1 - female, 2 - male
BB - biceps brachii muscle
RF - rectus femoris muscle
TA - tibialis anterior muscle
myometric parameters: F (frequency), D (decrement), S (stiffness), C (creep), R (relaxation)
ex.
BBF - myometric frequency of biceps brachii
RFD - myometric decrement of rectus femoris muscle
TAS - mtometric stiffness of tibialis anterior muscle
A detailed description can be found in the article.
